# Supplementary figures and images for: Novel osmotin inhibits SREBP2 via the AdipoR1/AMPK/SIRT1 pathway to improve Alzheimer's disease neuropathological deficits
Source: PubMed Central journal article supplement — Mol Psychiatry. 2016 Mar 22;22(3):407–16. doi: 10.1038/mp.2016.23 (PMC5322276; doi:10.1038/mp.2016.23), 2016-03-22

# Supplementary Figure S1

**a**

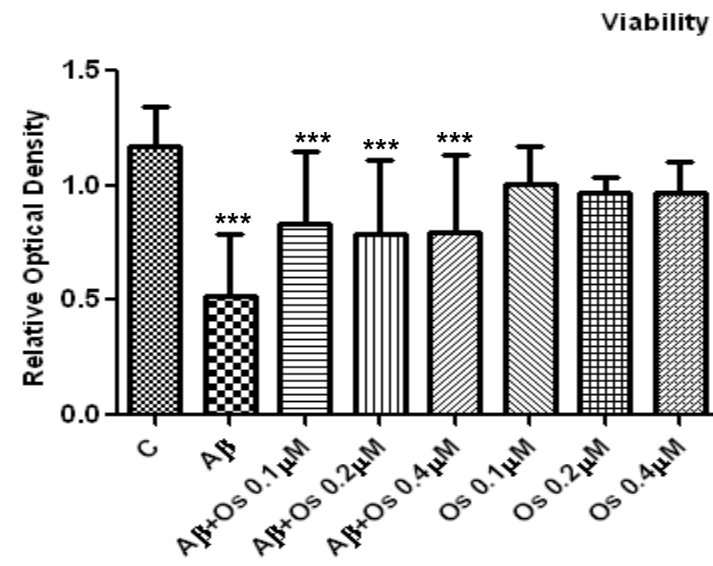

**b**

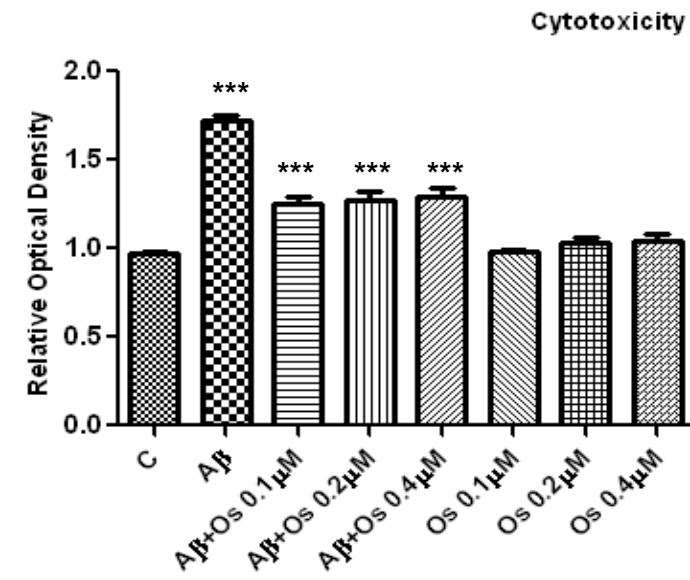

**c**

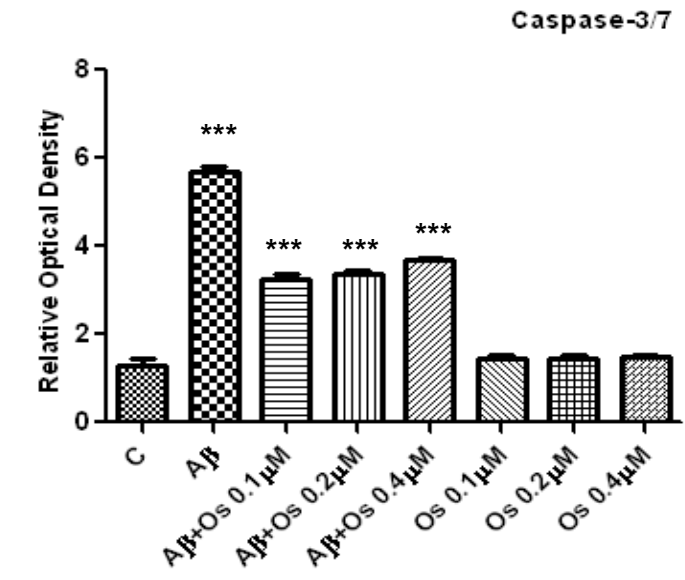

**d**

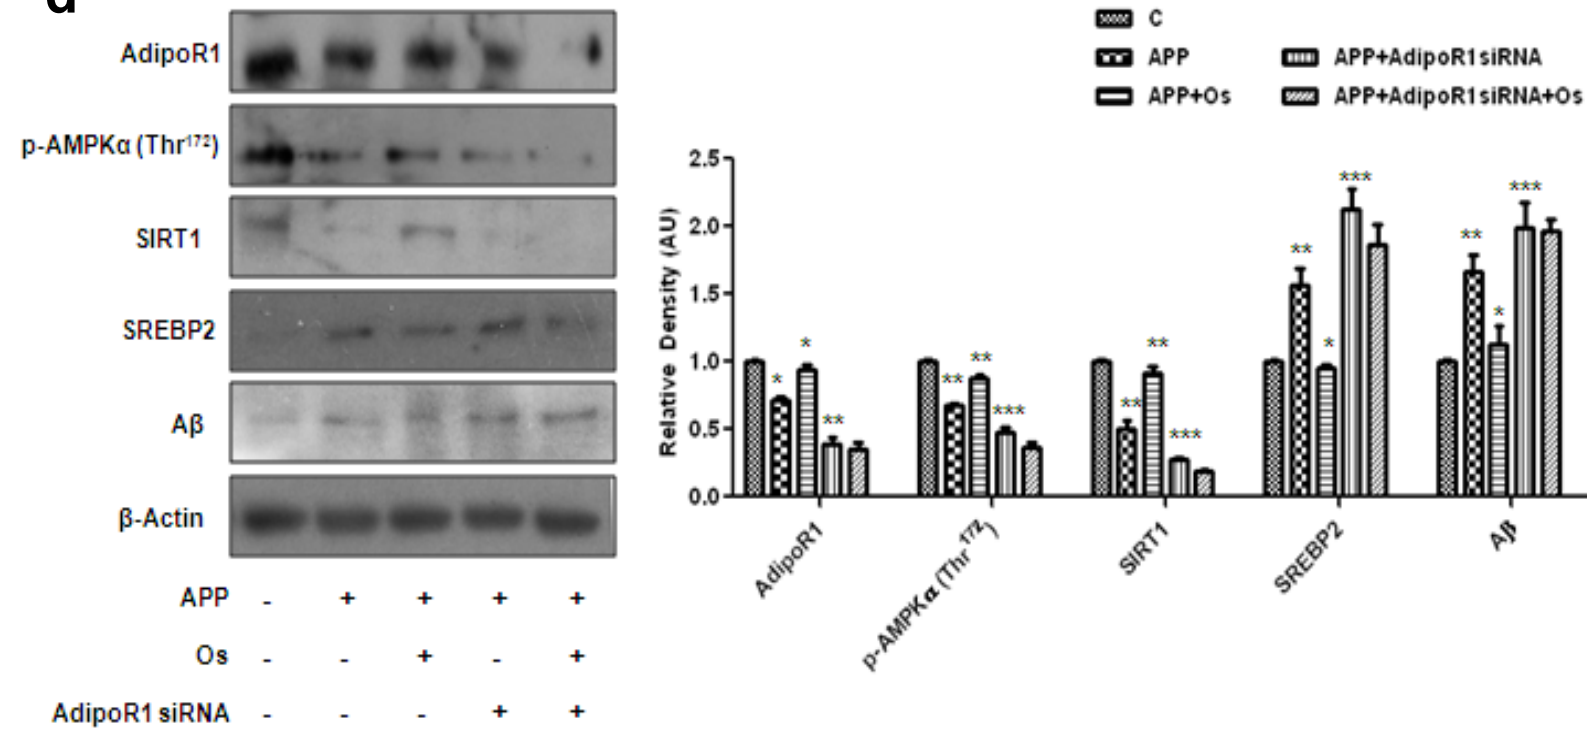

**e**

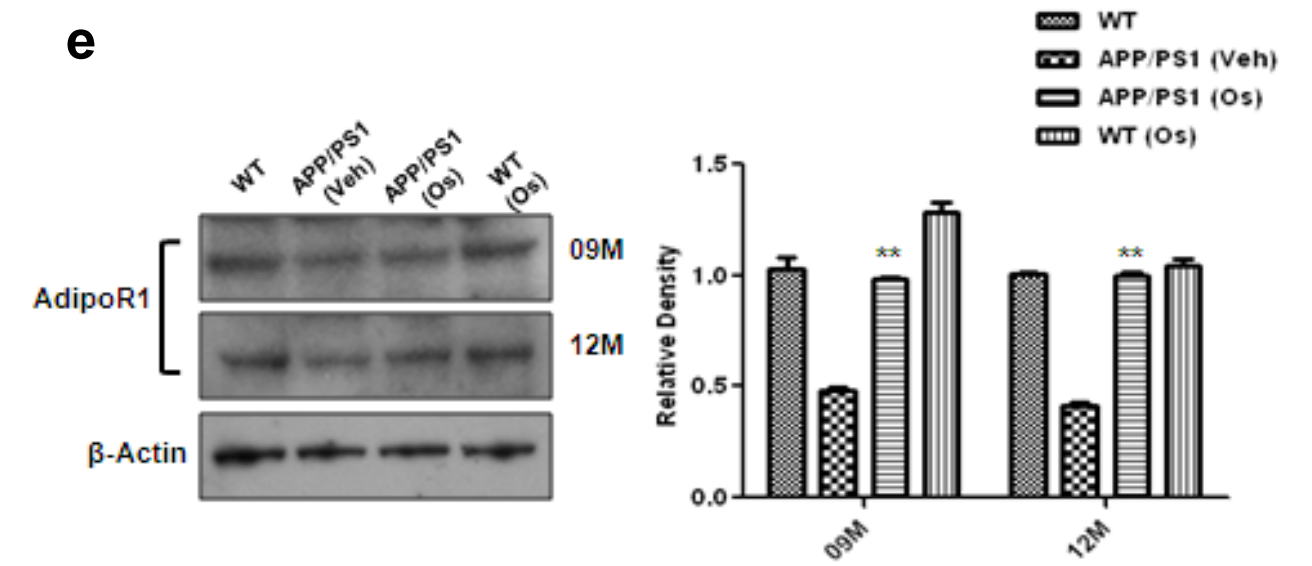

**f**

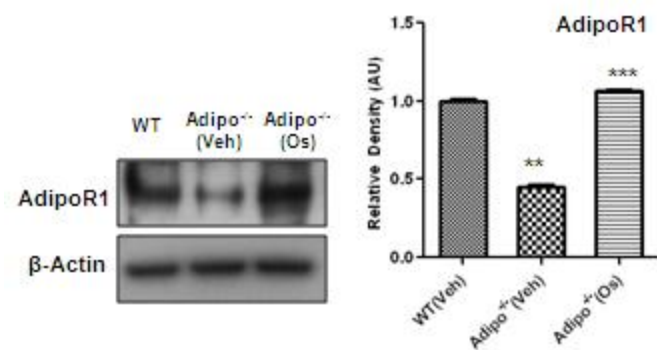

**g**

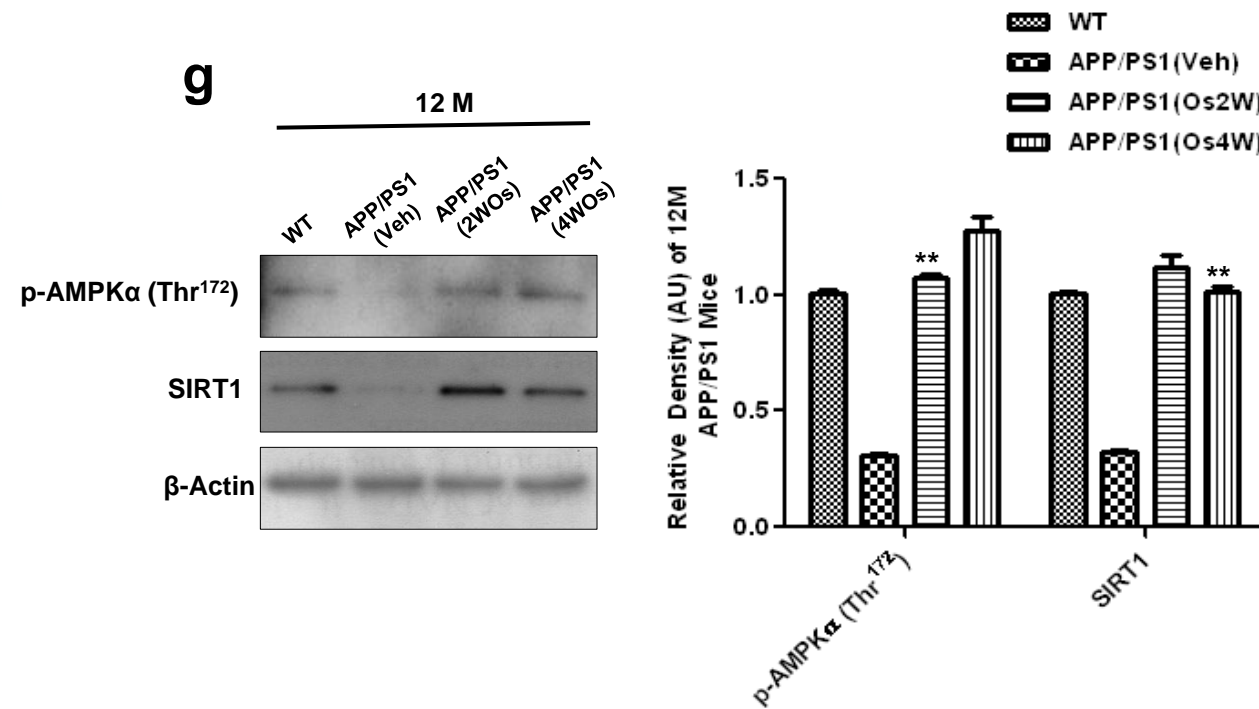

**h**

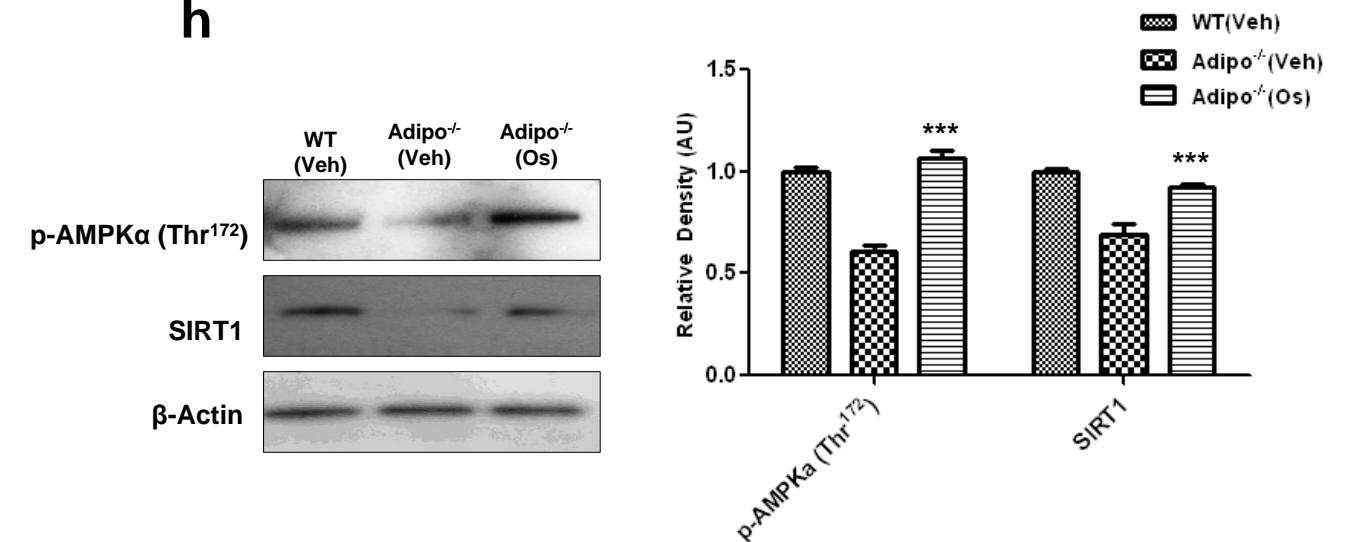

Supplement: mp201623x1.pdf [file mp201623x1.pdf]

# Supplementary Figure S2

**a**

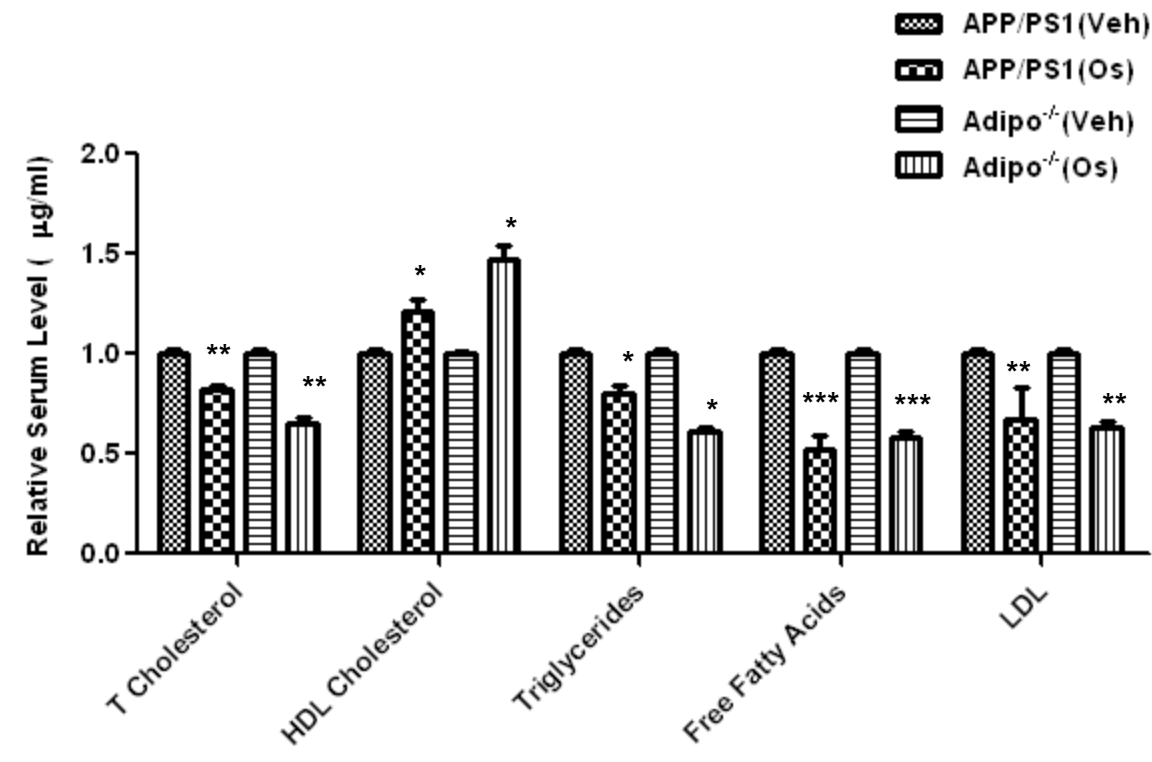

**b**

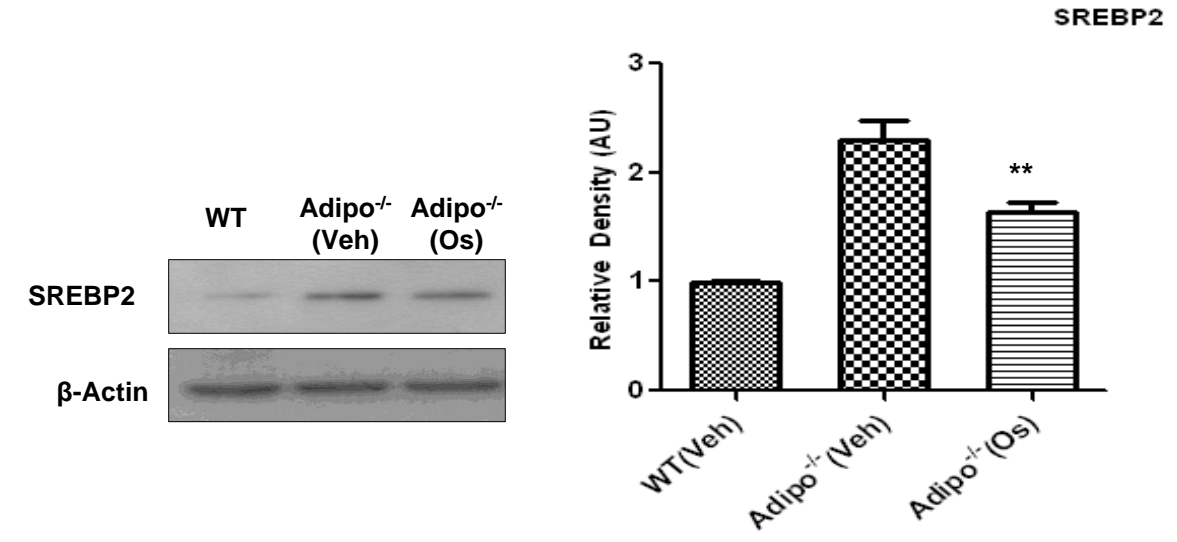

Supplement: mp201623x2.pdf [file mp201623x2.pdf]

# Supplementary Figure S3

**a**

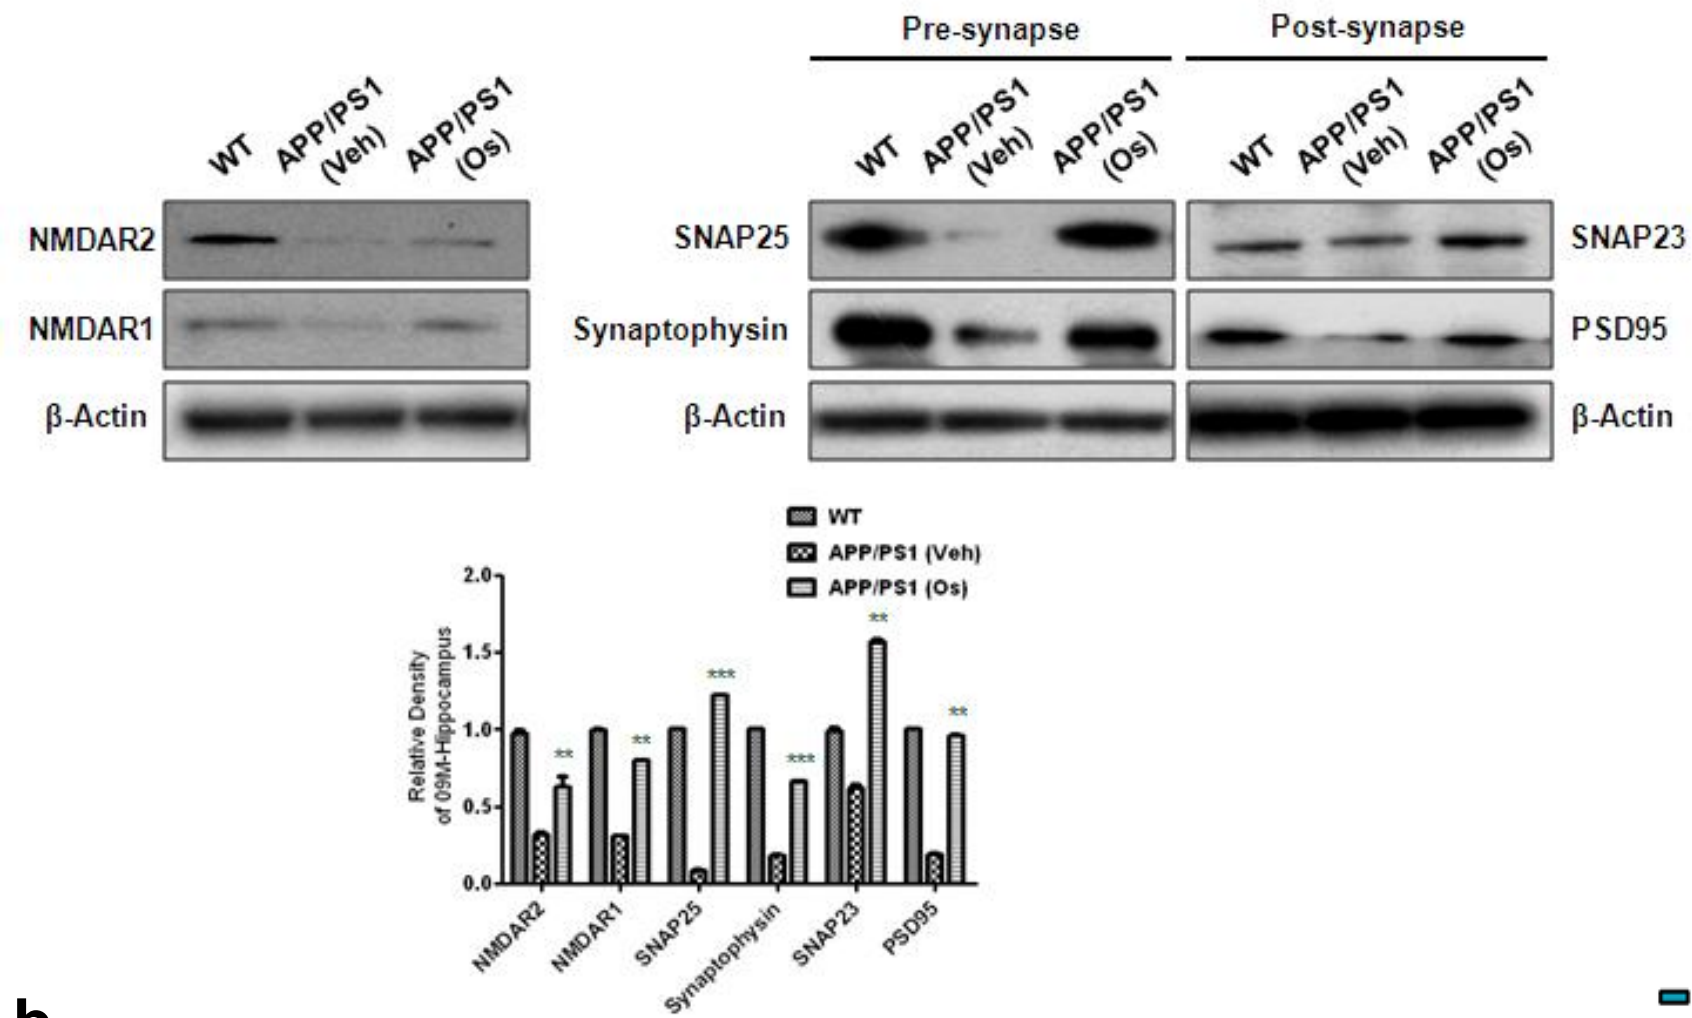

**b**

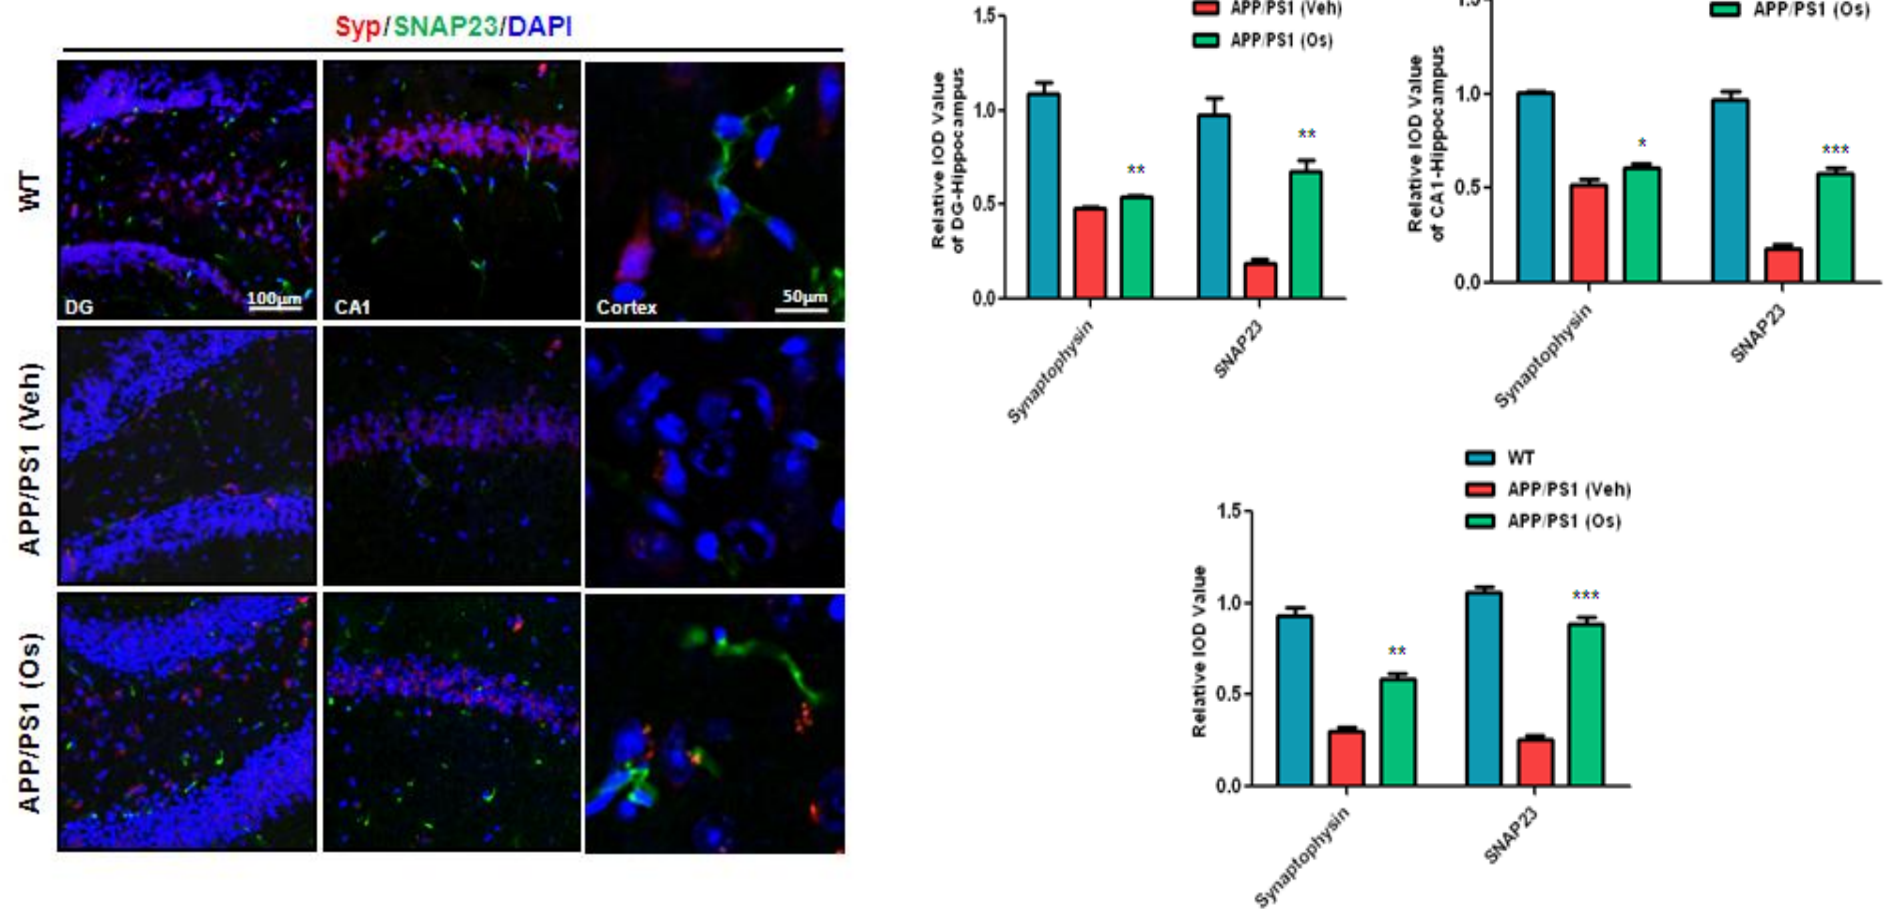

Supplement: mp201623x3.pdf [file mp201623x3.pdf]

# Supplementary Figure S4

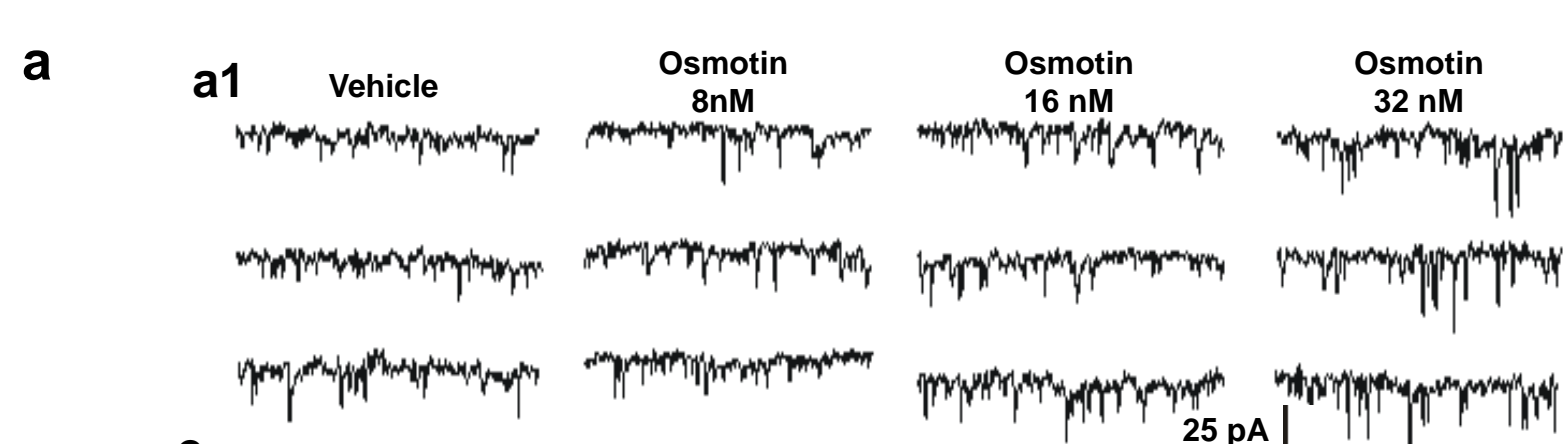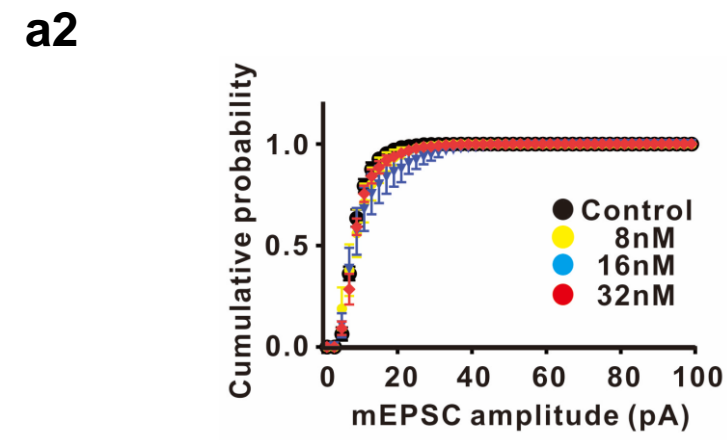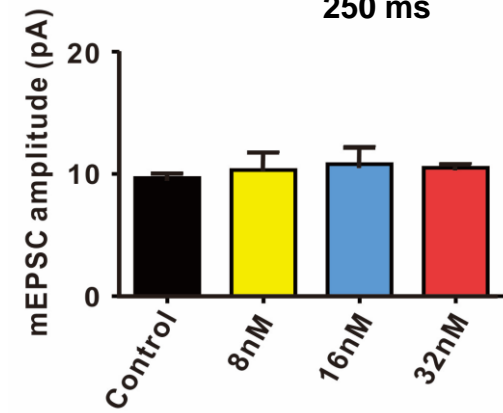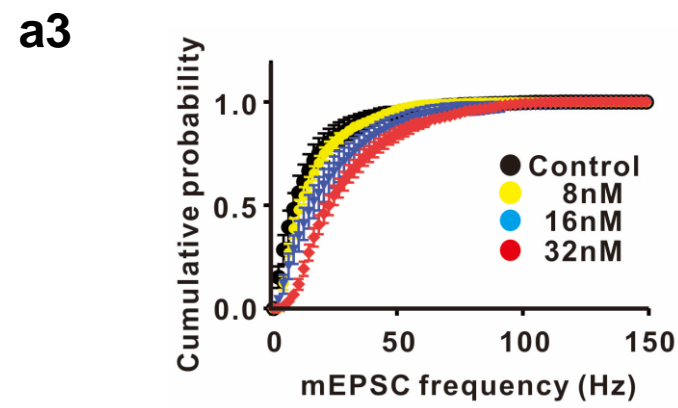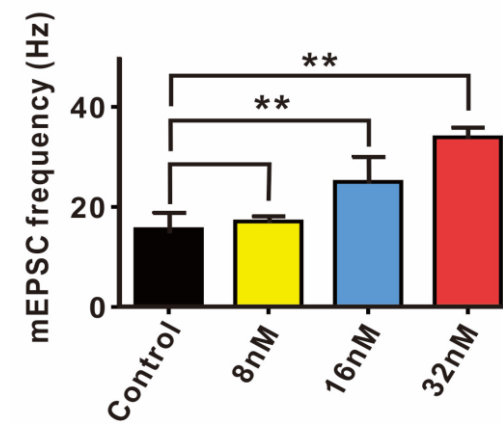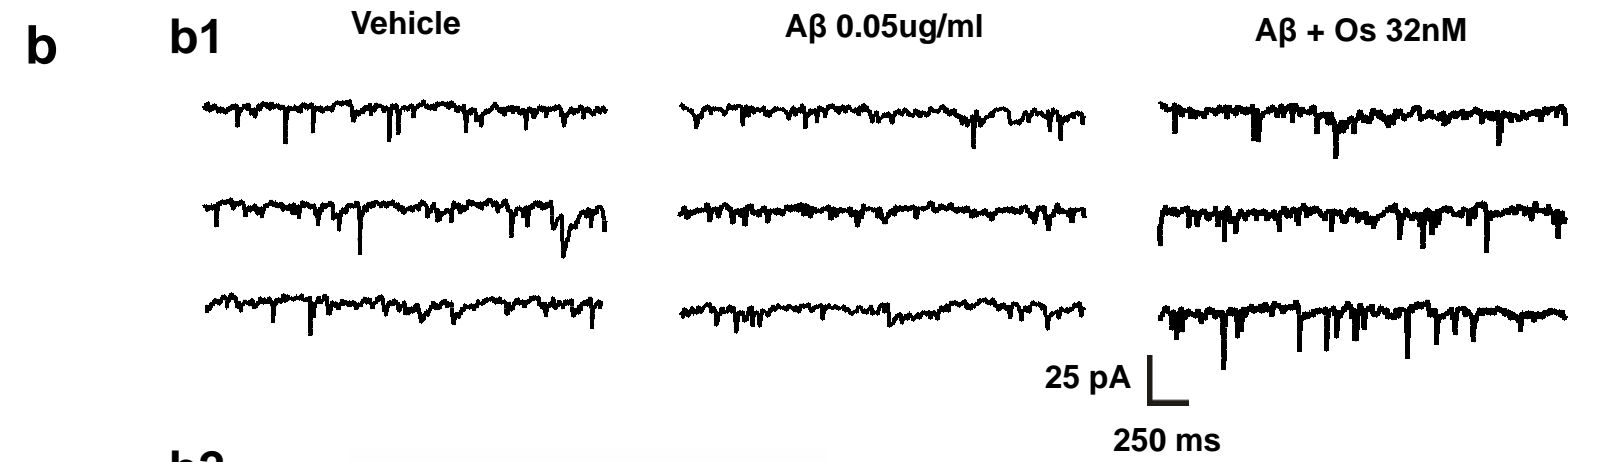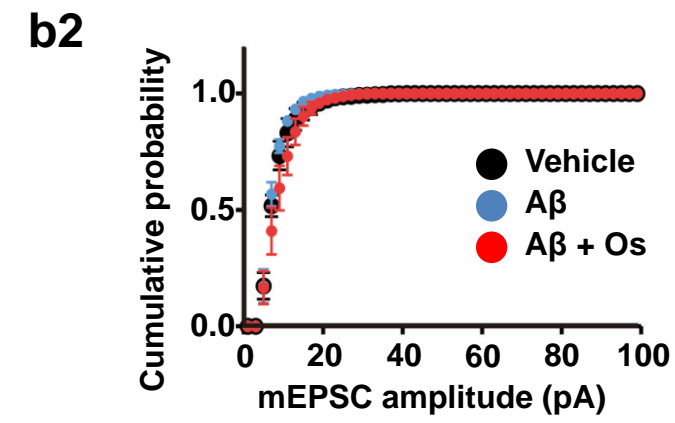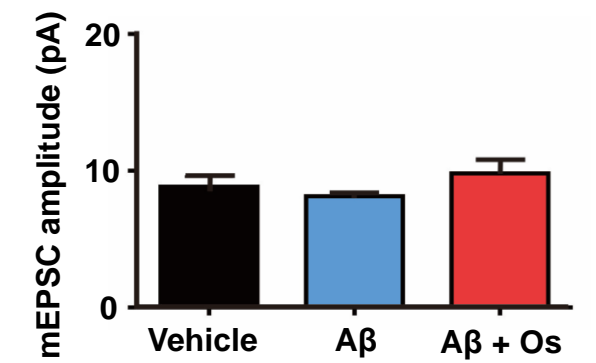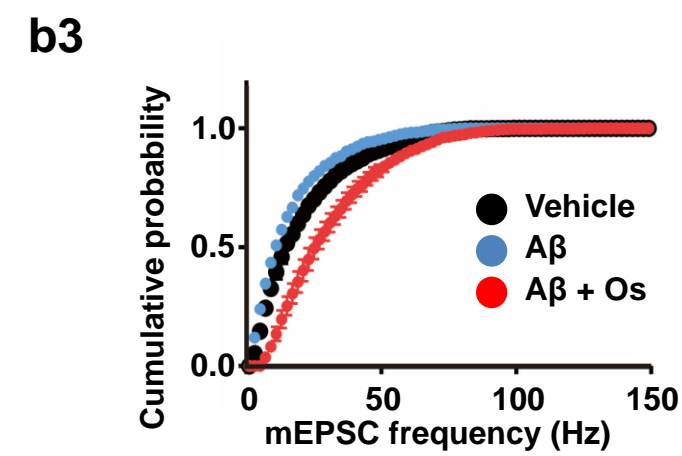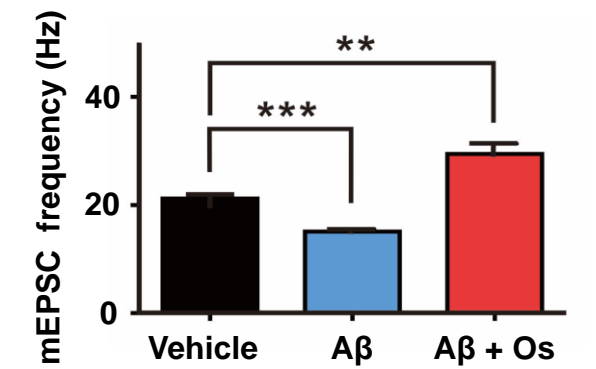

Supplement: mp201623x4.pdf [file mp201623x4.pdf]

# Supplementary Figure S5

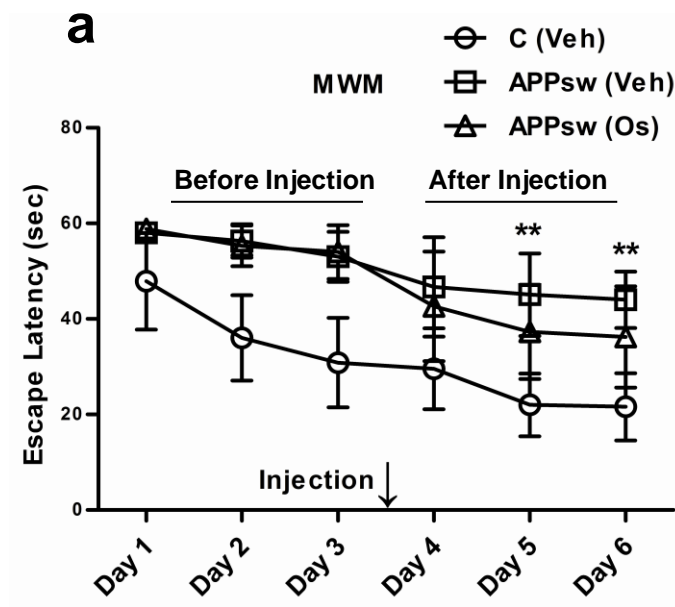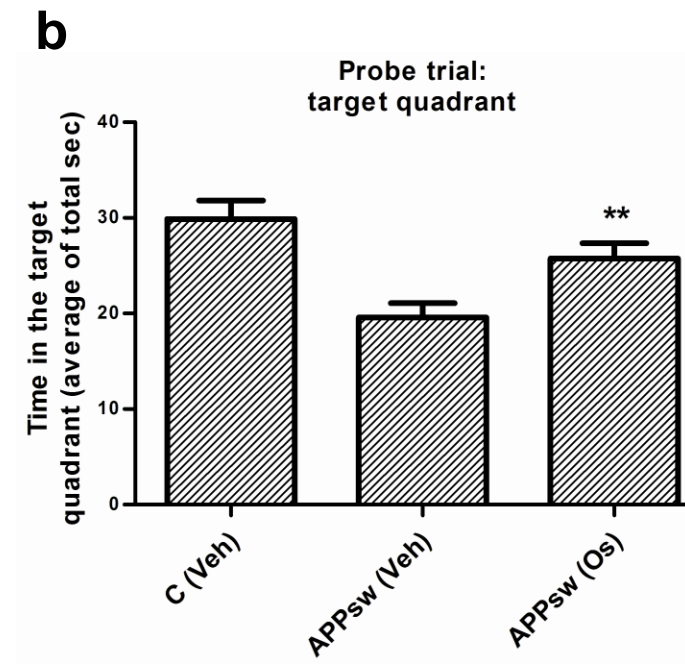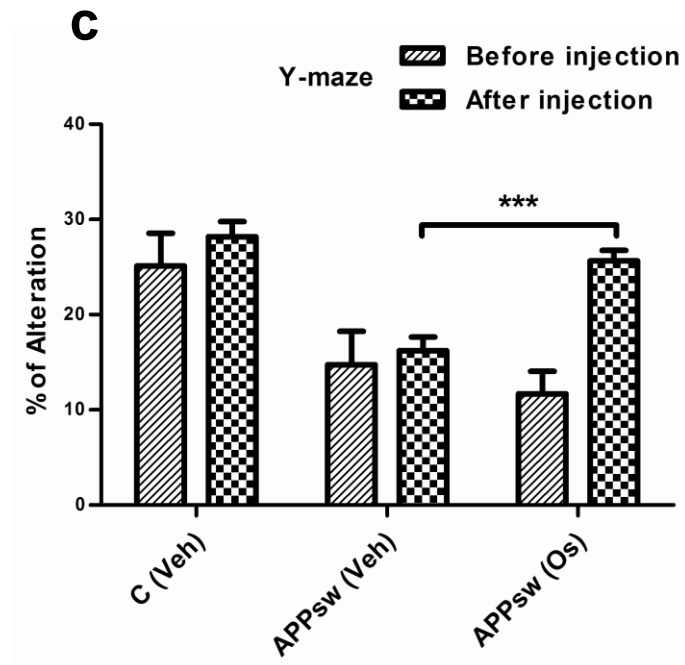

Supplement: mp201623x5.pdf [file mp201623x5.pdf]
